# Supplementary material
Source: PubMed Central journal article supplement (PMC5119459)

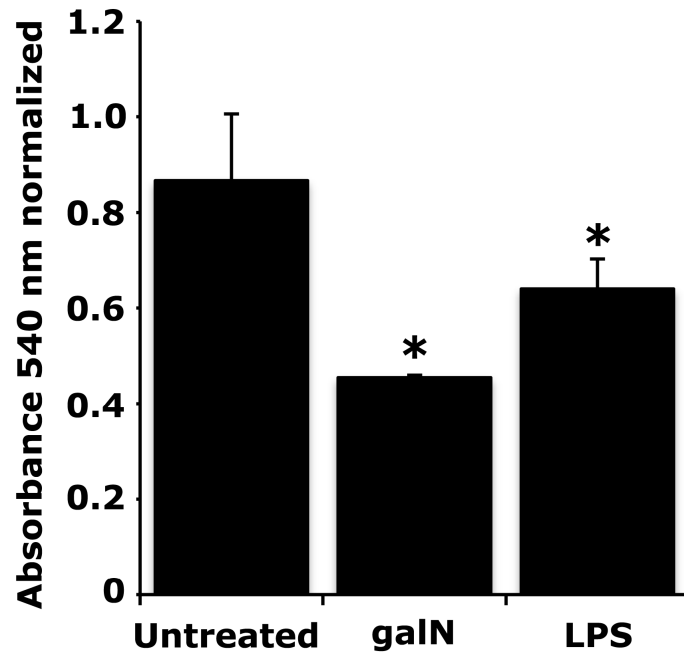

Supplement: NIHMS808539-supplement-Supplemental_Figure_1.pdf [file NIHMS808539-supplement-Supplemental_Figure_1.pdf]

# Peptide identification from an LC-DIA-MS analysis.

A

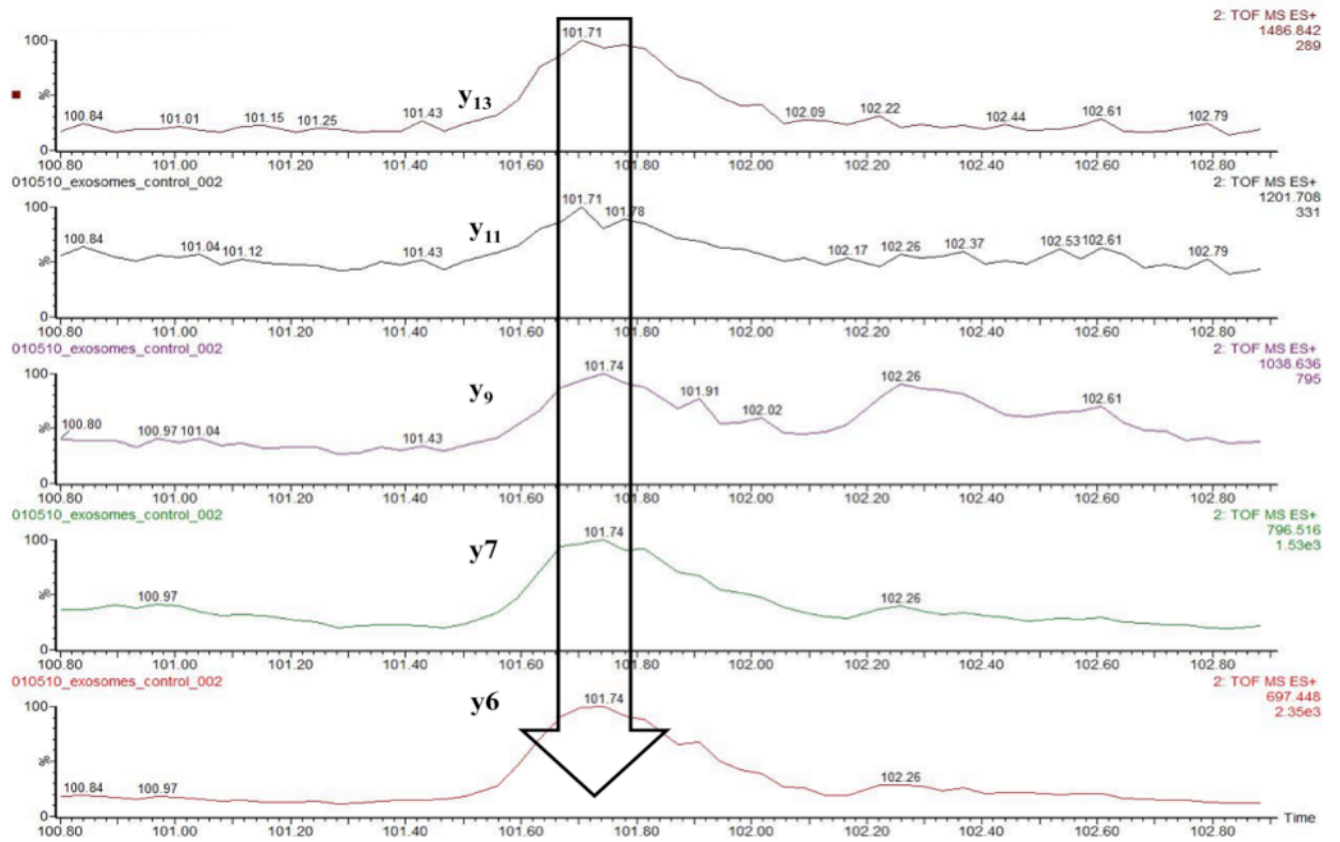

B

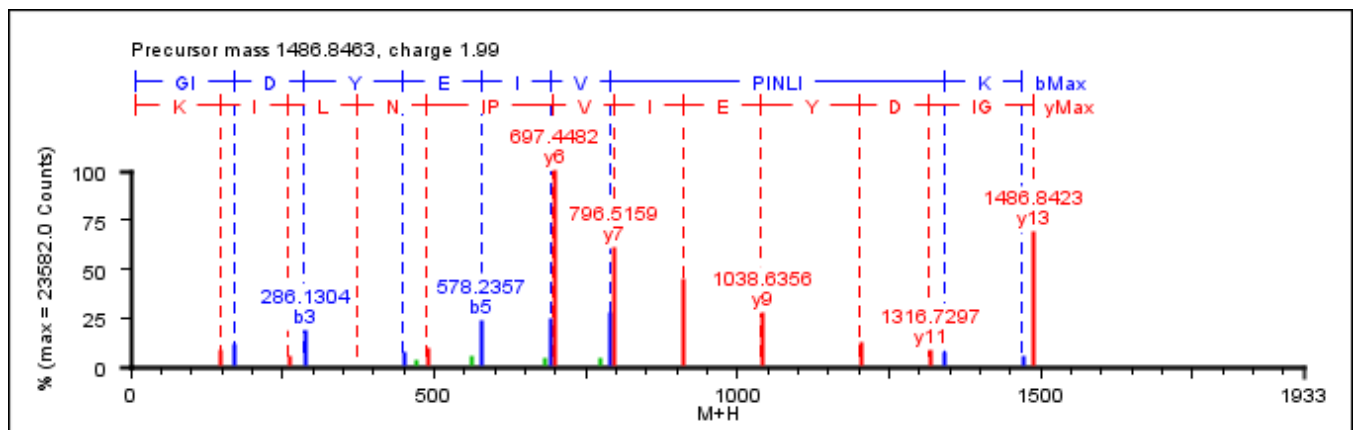

Supplement: NIHMS808539-supplement-Supplemental_Figure_2.pdf [file NIHMS808539-supplement-Supplemental_Figure_2.pdf]
